# Supplementary material
Source: publisher figshare collection journal article supplement (https://tandf.figshare.com/ndownloader/files/33962979)
Supplement: Supplementary file 1 [file 33962979]

**Supporting Information**

**LSD1 inhibitors from the roots of *Pueraria lobata***

Meng-Ru Tiana#, Kun Duab#*, Yan-Le Zhia, Gui-Min Xuea, Zhen-Zhu Zhaoa, Ying-Ying Sia, Hui Chena, Yan-Jun Suna, Wei-Sheng Fenga, Jin-Lian Mac*

aSchool of Pharmacy, Henan University of Chinese Medicine, Zhengzhou 450046, China

bThe First Affiliated Hospital of Henan University of Chinese Medicine, Zhengzhou 450000, China

cAcademy of Chinese Medical Sciences, Henan University of Chinese Medicine, Zhengzhou, 450046, China

*Corresponding author:

Dr. Kun Du, E-mail: [qqninenine@hotmail.com](mailto:qqninenine@hotmail.com)

Dr. Jin-Lian Ma, E-mail: [lianzi556@163.com](mailto:lianzi556@163.com)

# co-first author

**Table of content**

Figure S1. 1H NMR spectrum of compound **1** in DMSO-*d*6·······························3 Figure S2. 13C NMR spectrum of compound **1** in DMSO-*d*6·······························3

Figure S3. DEPT135 spectrum of compound **1** in DMSO-*d*6······························4

Figure S4. 1H-1H COSY spectrum of compound **1** in DMSO-*d*6··························4

Figure S5. HSQC spectrum of compound **1** in DMSO-*d*6··································5

Figure S6. HMBC spectrum of compound **1** in DMSO-*d*6·································5

Figure S7. HRESIMS of compound **1**·························································6 Figure S8. 1H NMR spectrum of compound **7** in DMSO-*d*6·······························6

Figure S9. 13C NMR spectrum of compound **7** in DMSO-*d*6·······························7

Figure S10. DEPT135 spectrum of compound **7** in DMSO-*d*6·····························7

Figure S11. 1H-1H COSY spectrum of compound **7** in DMSO-*d*6························8

Figure S12. HSQC spectrum of compound **7** in DMSO-*d*6································8

Figure S13. HMBC spectrum of compound **7** in DMSO-*d*6································9

Figure S14. NOESY spectrum of compound **7** in DMSO-*d*6·······························9

Figure S15. HRESIMS of compound **7**······················································10

Figure S16. Calculated ECD spectra of 6a*S*,11a*R*,11b*R*-**7** and 6a*R*,11a*S*,11b*S*-**7**······10

Figure S17. Calculated ECD spectra of 6a*R*,11a*S*,11b*R*-**7** and 6a*S*,11a*R*,11b*S*-**7**······11

Figure S18. Calculated ECD spectra of 6a*R*,11a*S*,11b*R*-**7** and 6a*R*,11a*R*,11b*S*-**7**······11


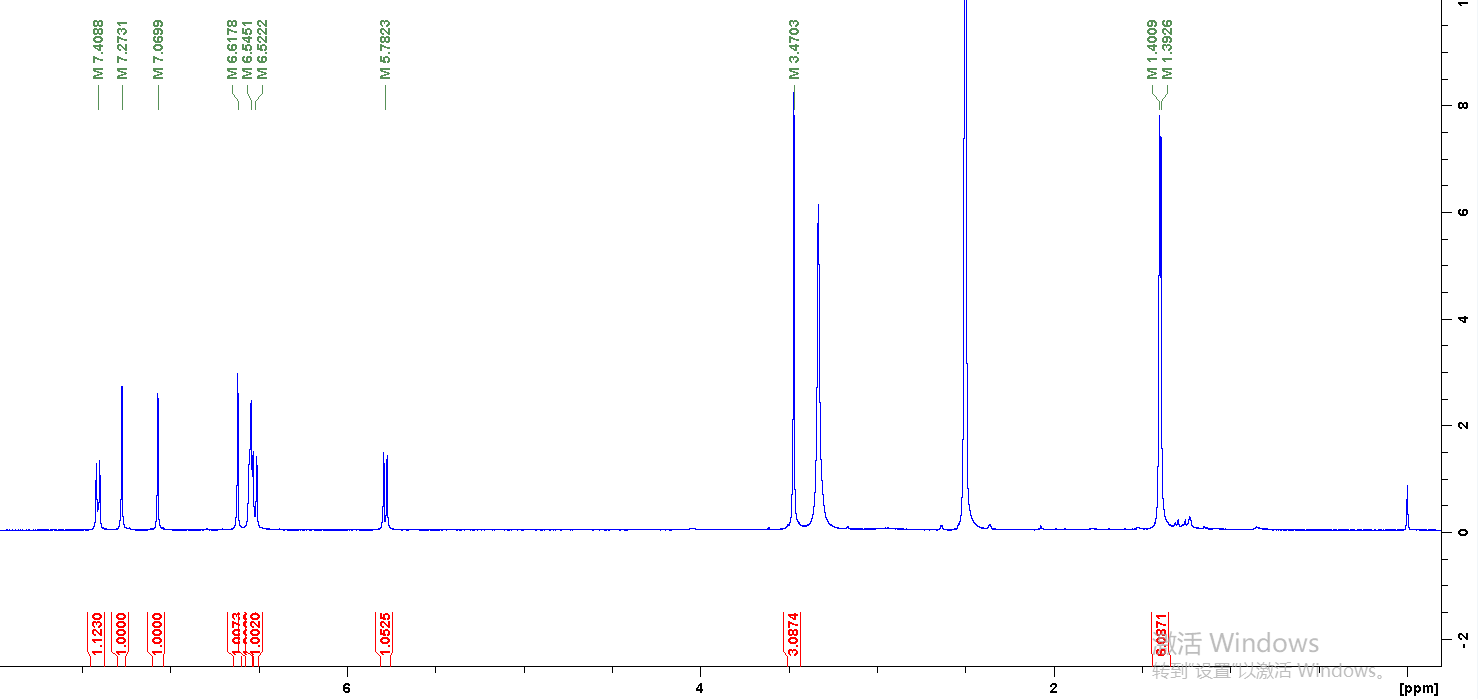


Figure S1. 1H NMR spectrum of compound **1** in DMSO-*d*6


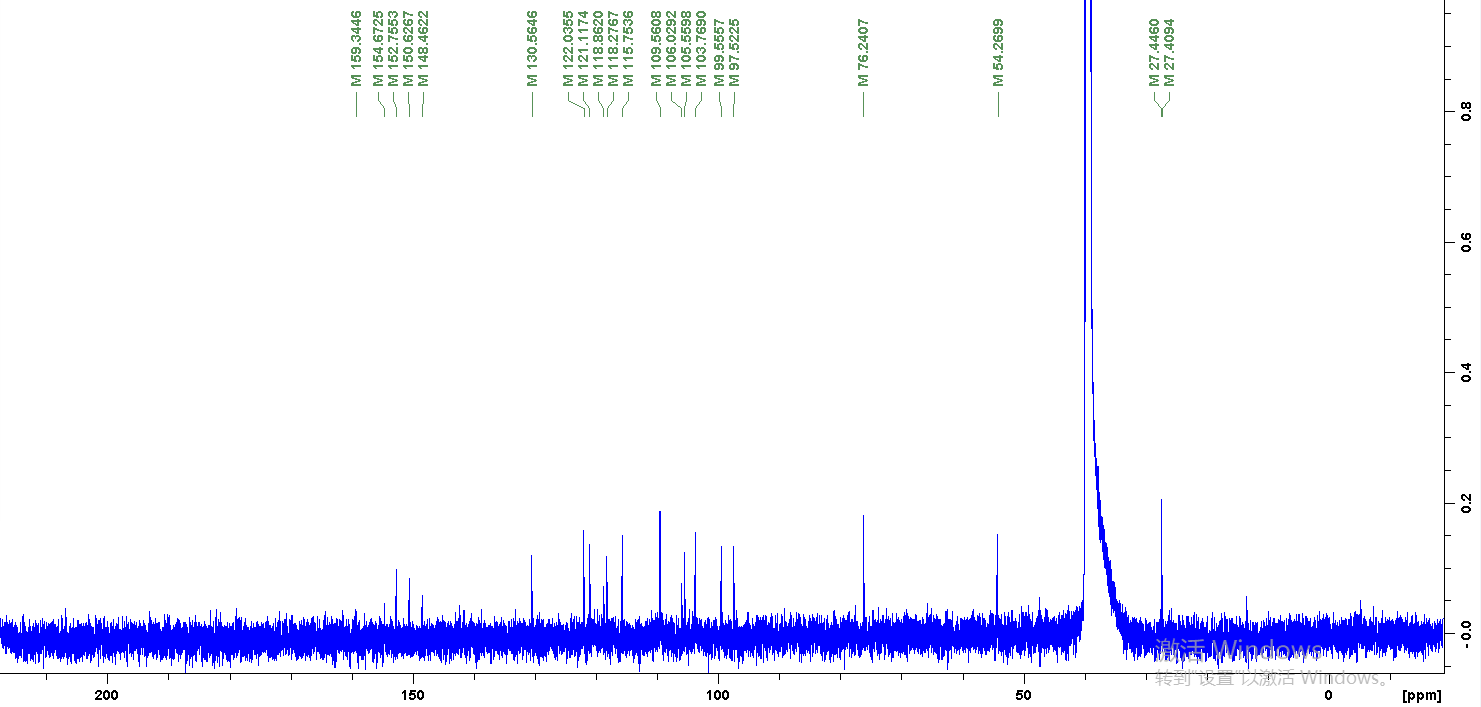


Figure S2. 13C NMR spectrum of compound **1** in DMSO-*d*6


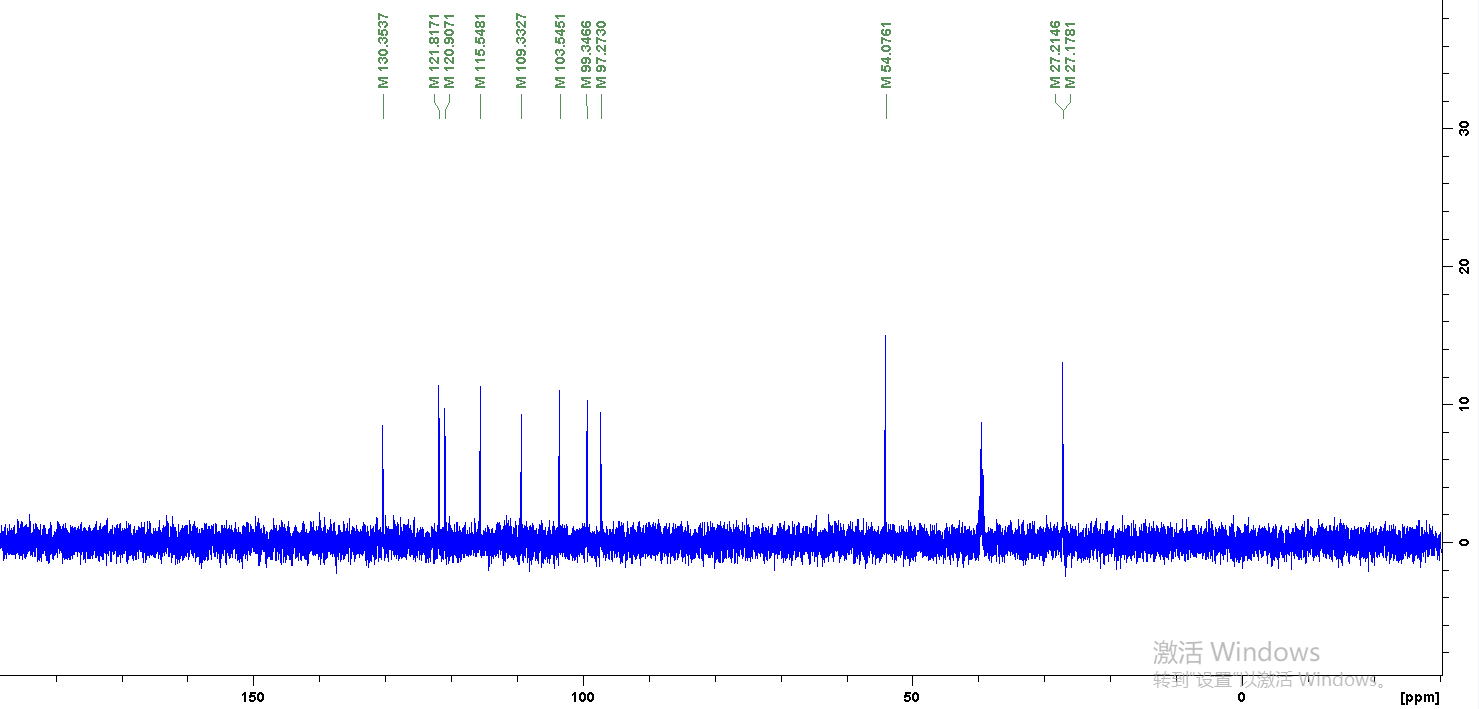


Figure S3. DEPT135 spectrum of compound **1** in DMSO-*d*6


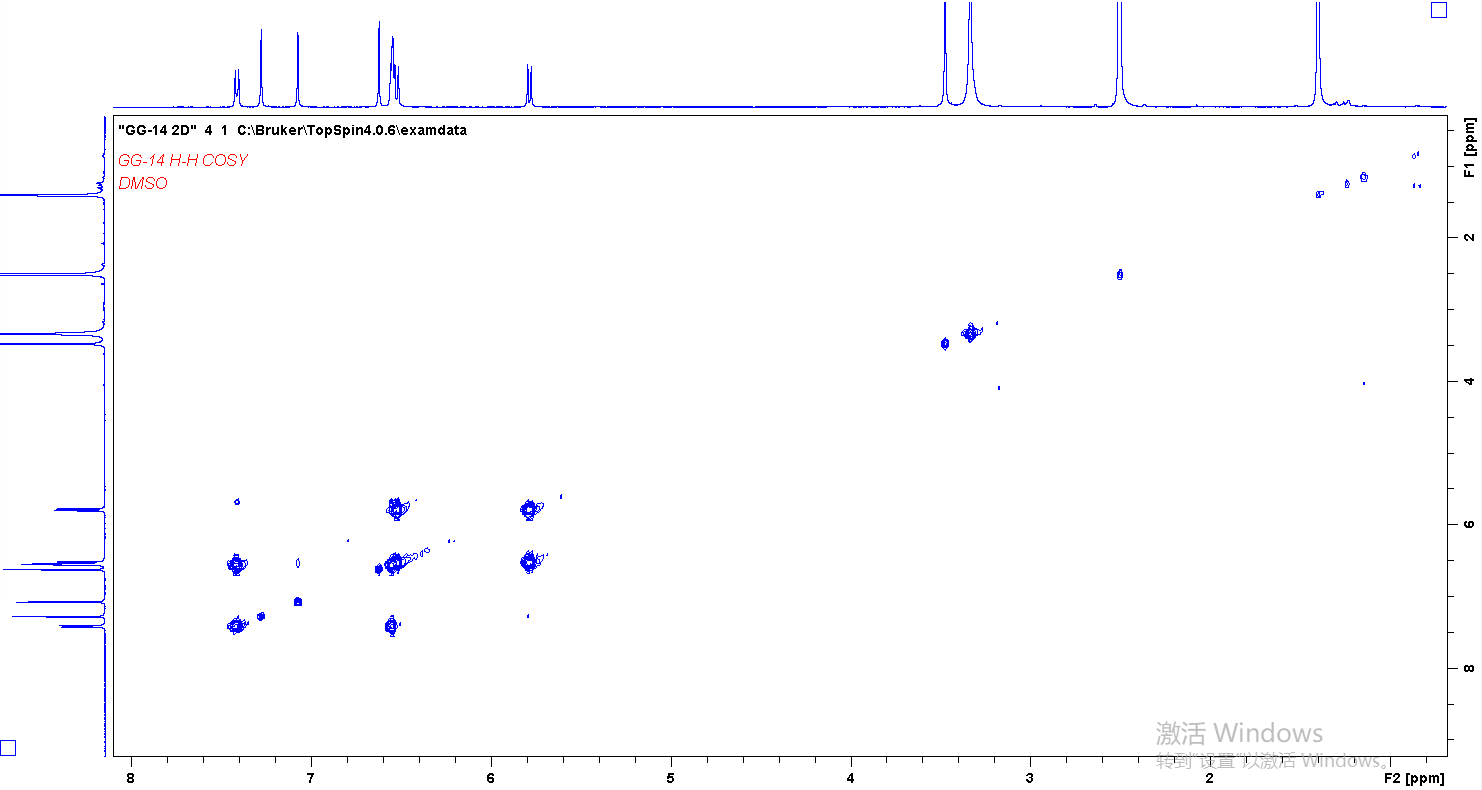


Figure S4. 1H-1H COSY spectrum of compound **1** in DMSO-*d*6


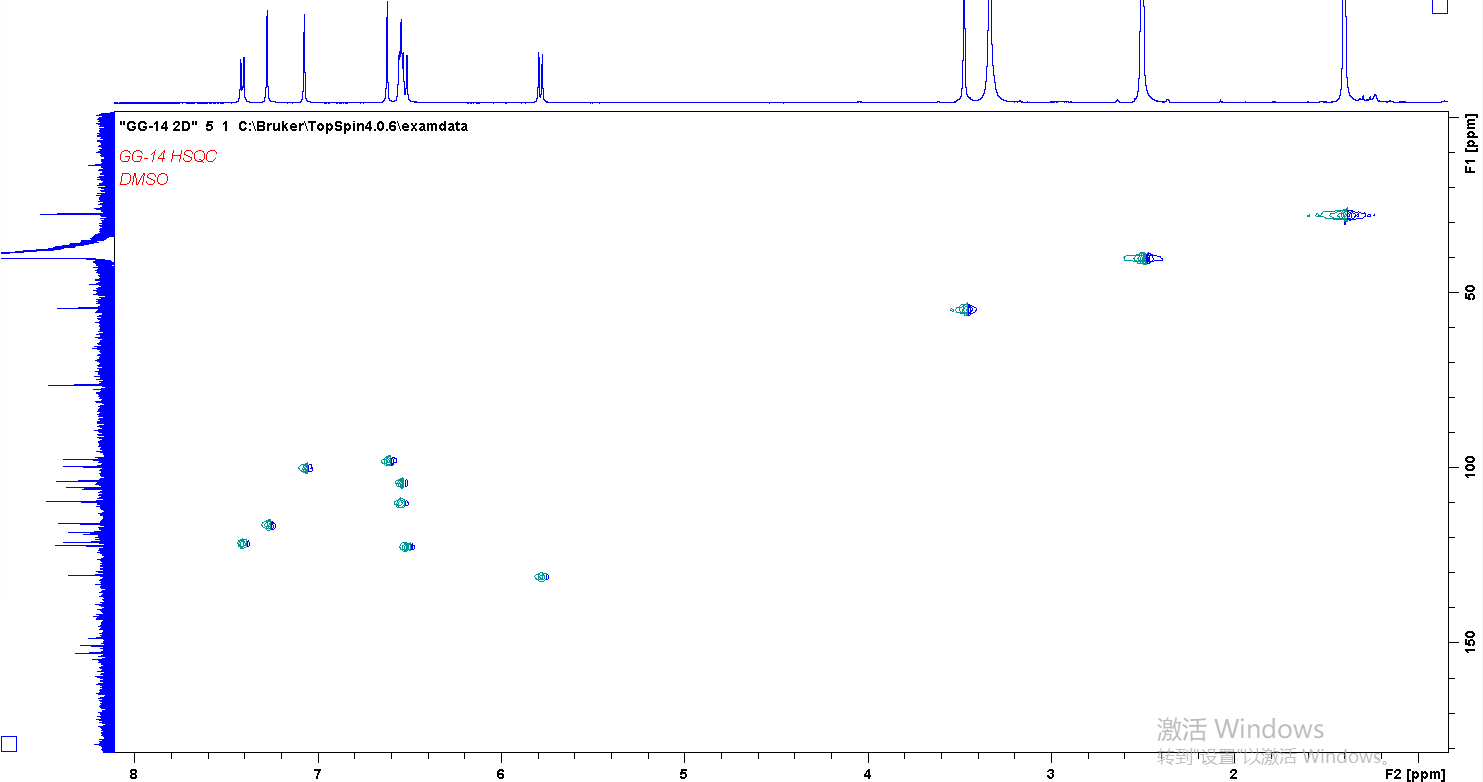


Figure S5. HSQC spectrum of compound **1** in DMSO-*d*6


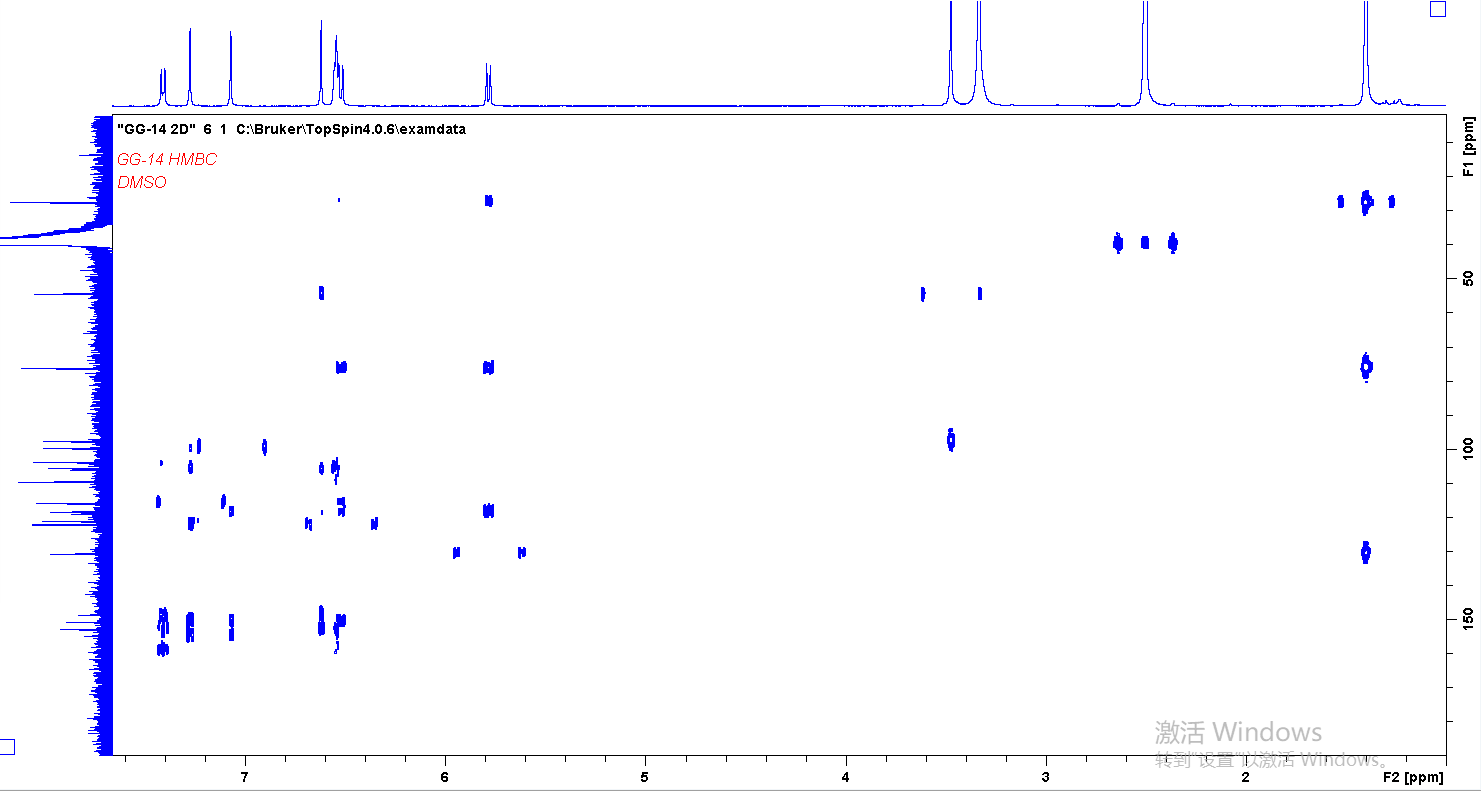


Figure S6. HMBC spectrum of compound **1** in DMSO-*d*6


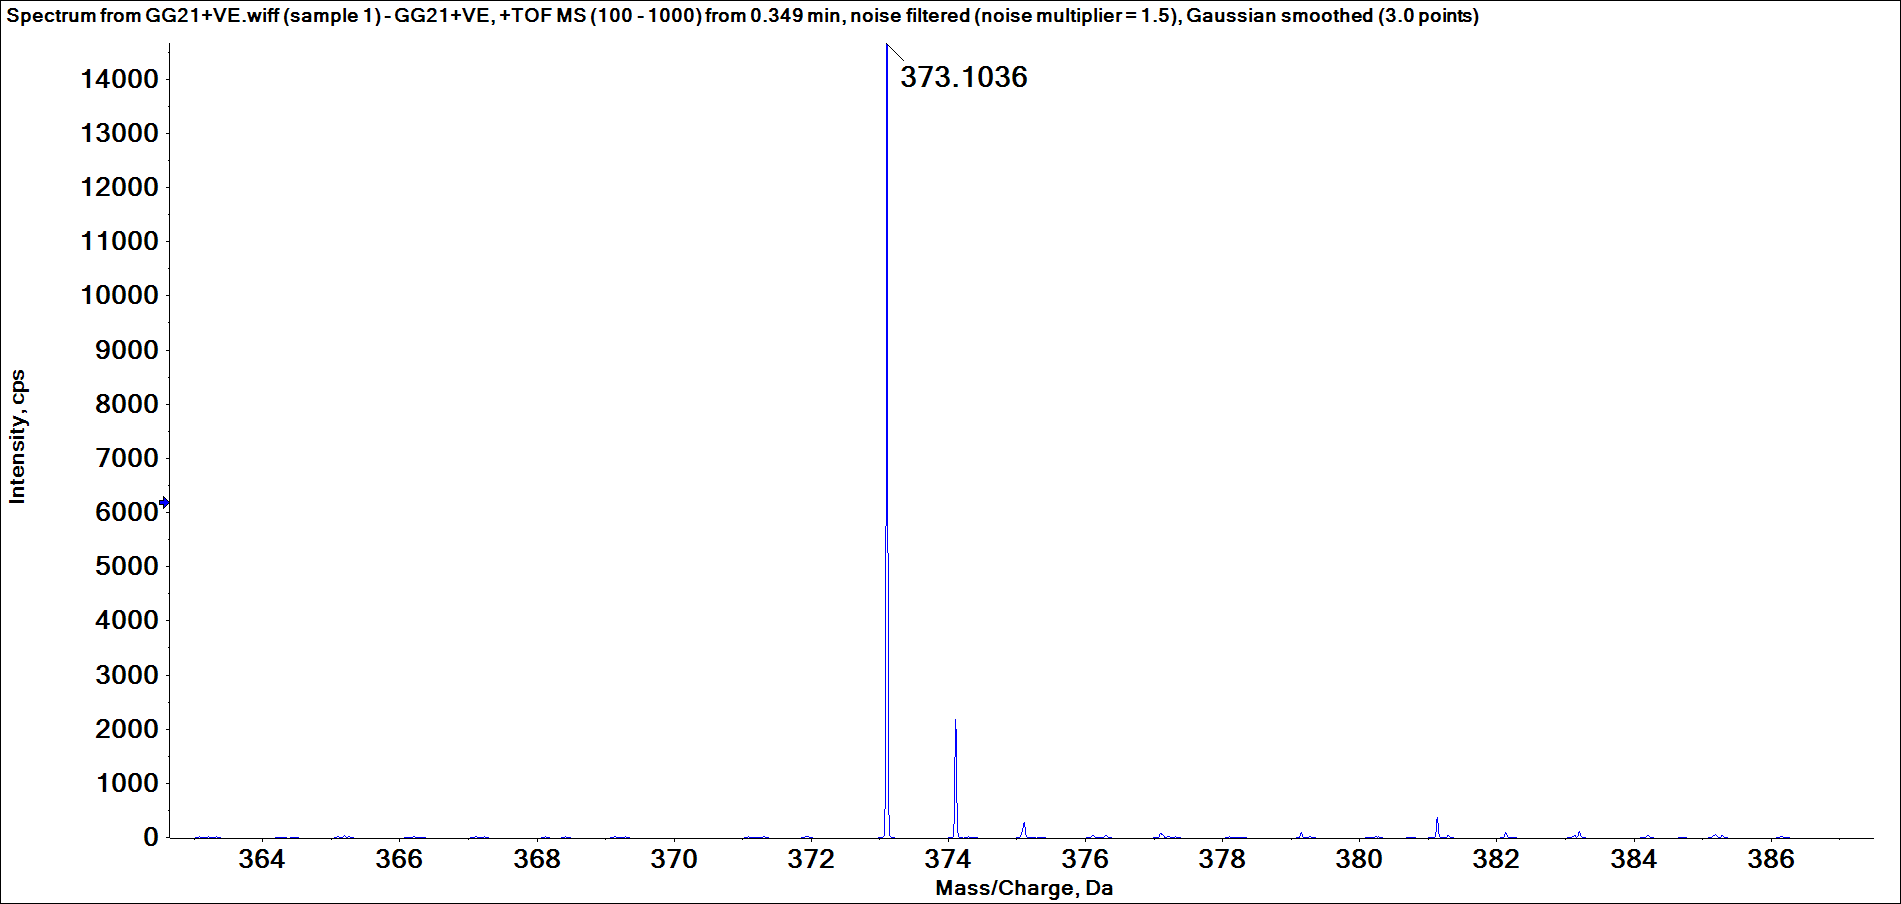


Figure S7. HRESIMS of compound **1**


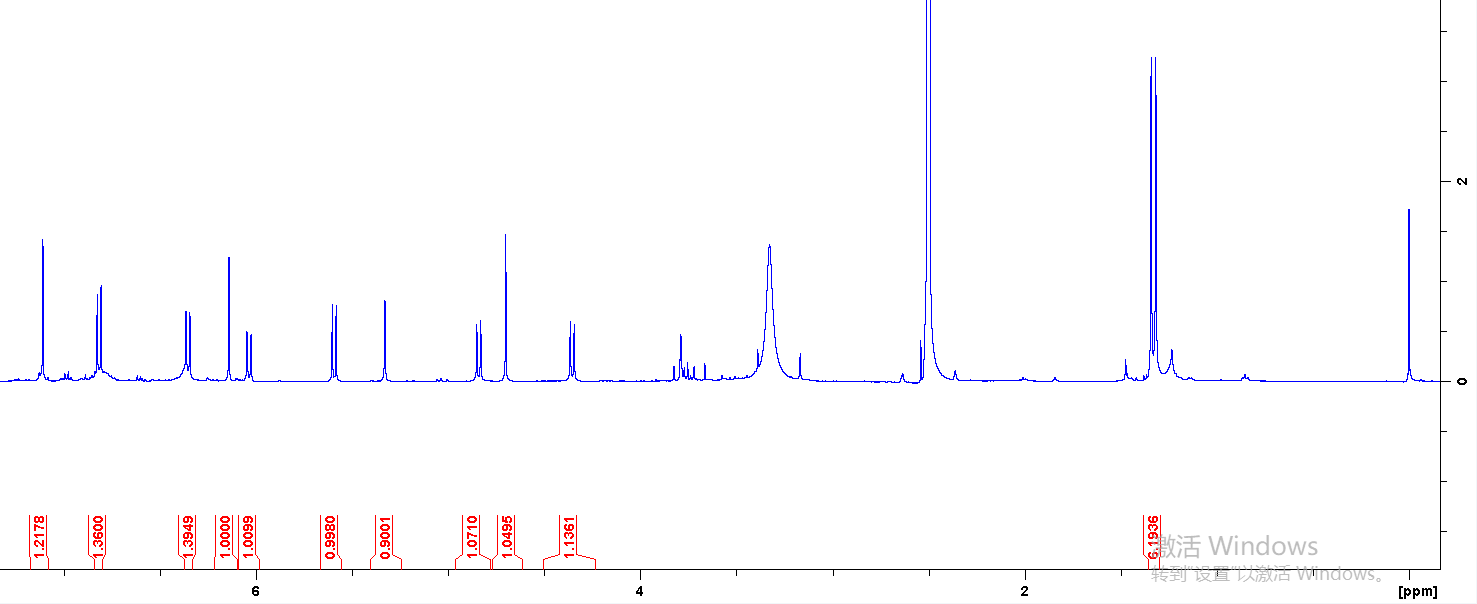


Figure S8. 1H NMR spectrum of compound **7** in DMSO-*d*6


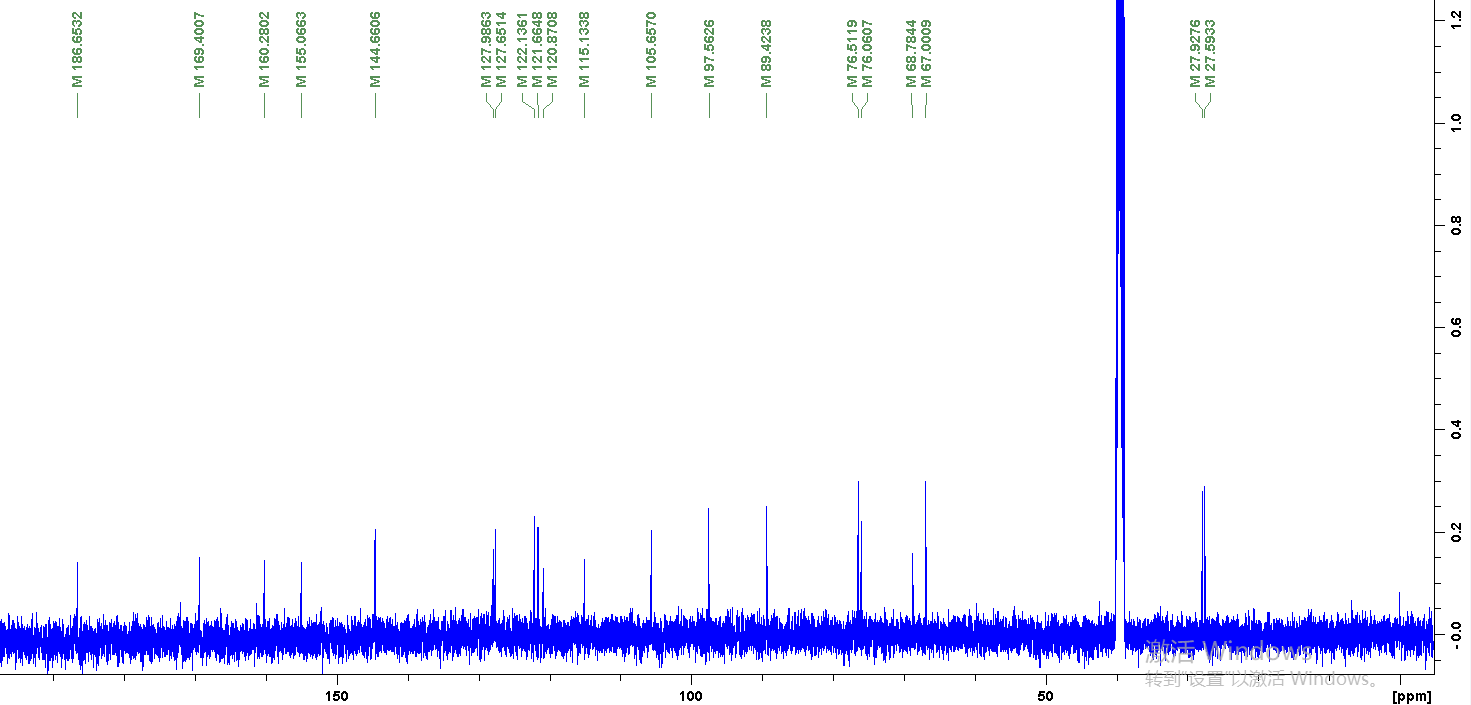


Figure S9. 13C NMR spectrum of compound **7** in DMSO-*d*6


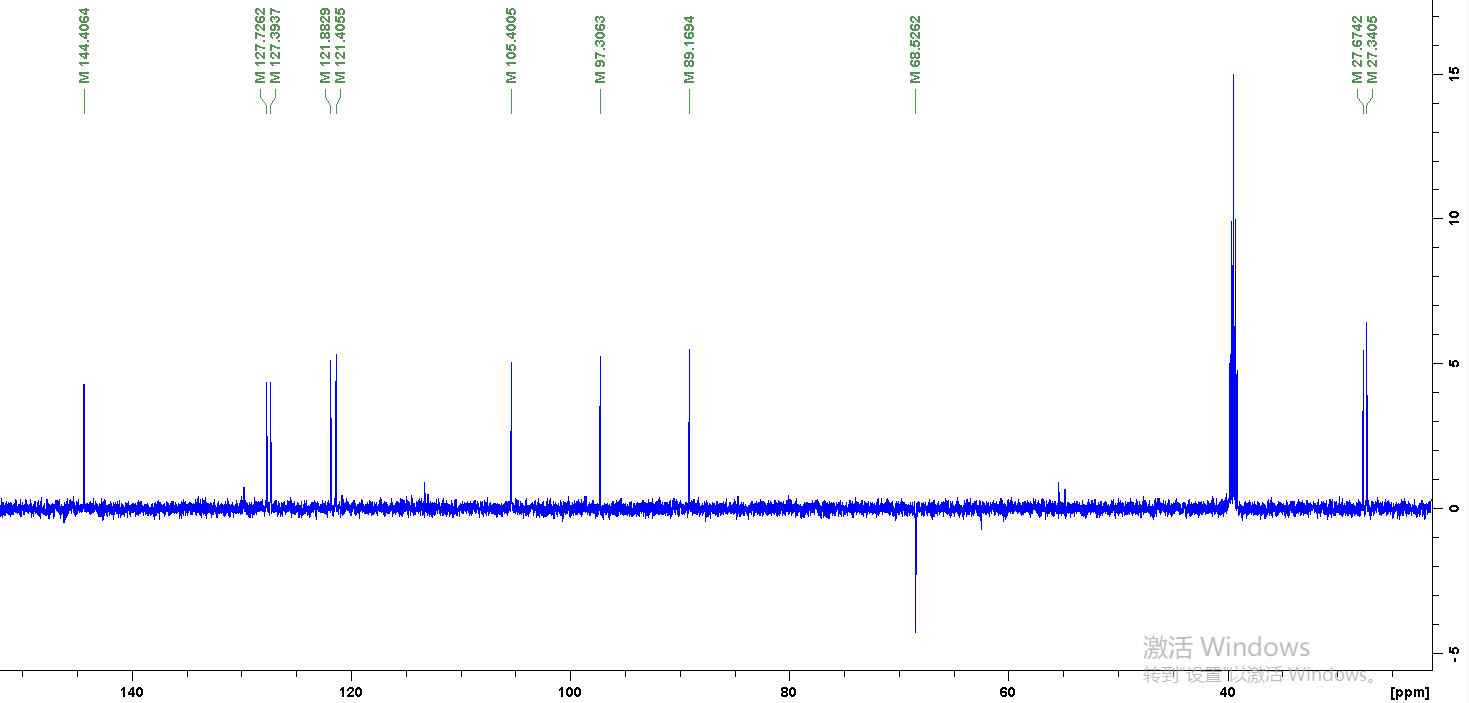


Figure S10. DEPT135 spectrum of compound **7** in DMSO-*d*6


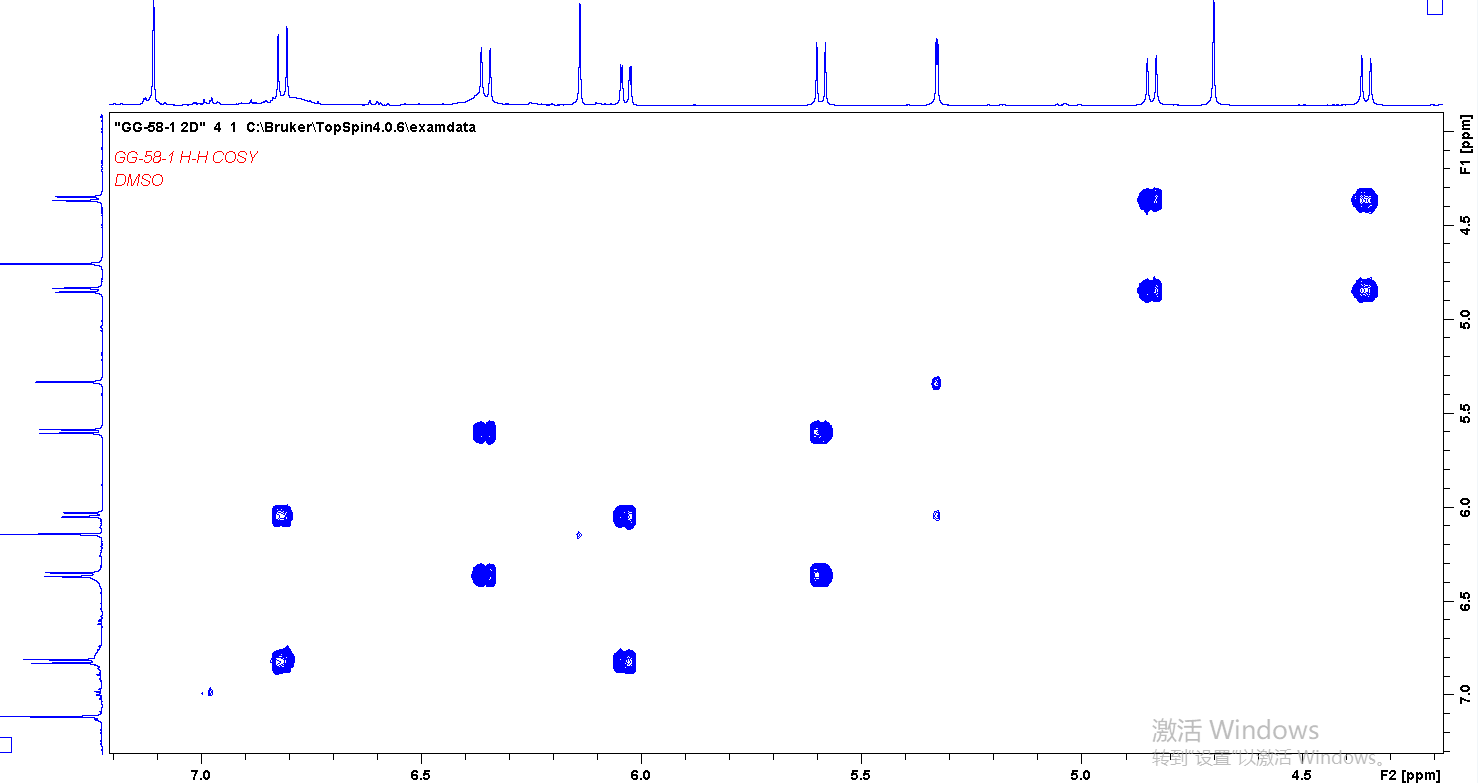


Figure S11. 1H-1H COSY spectrum of compound **7** in DMSO-*d*6


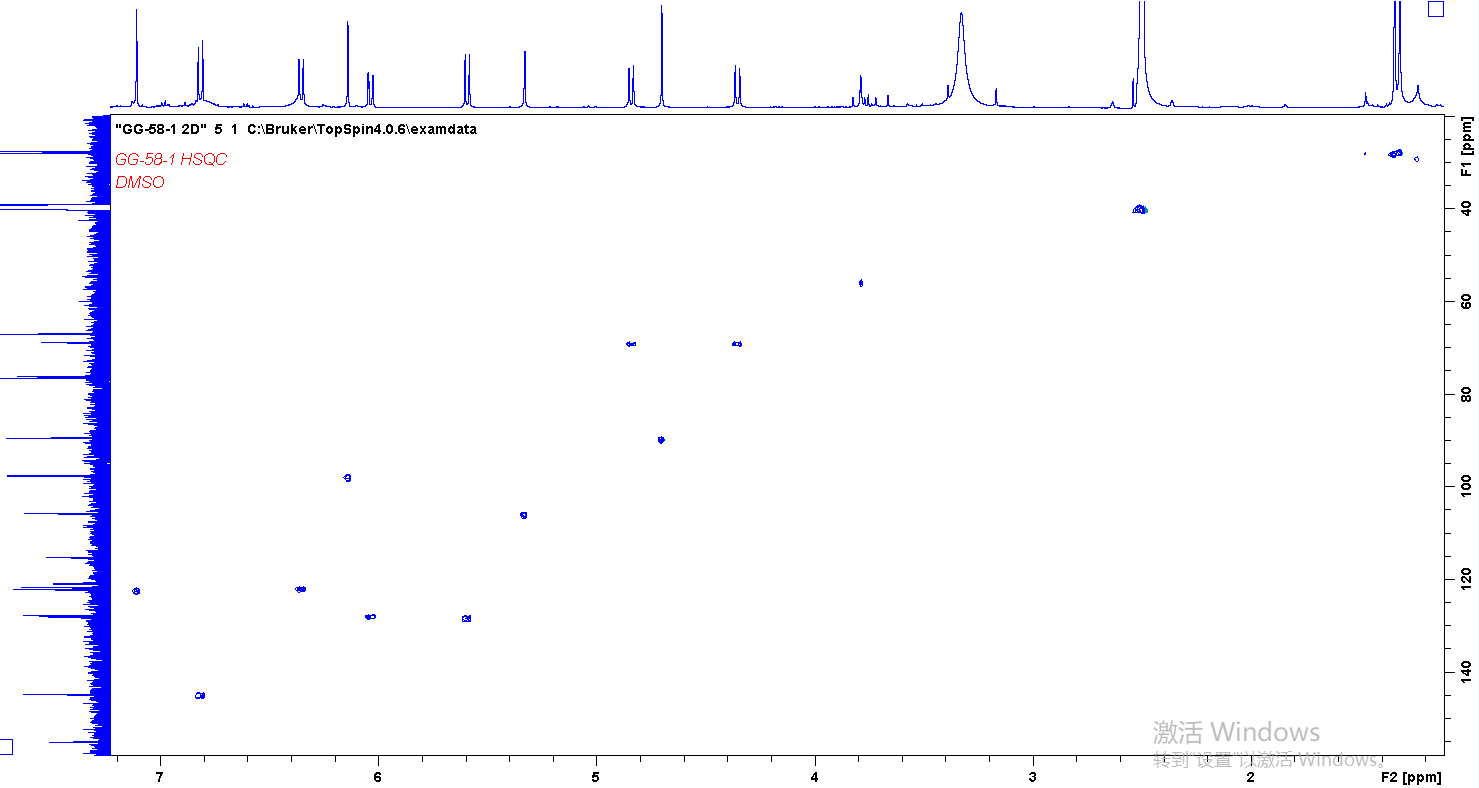


Figure S12. HSQC spectrum of compound **7** in DMSO-*d*6


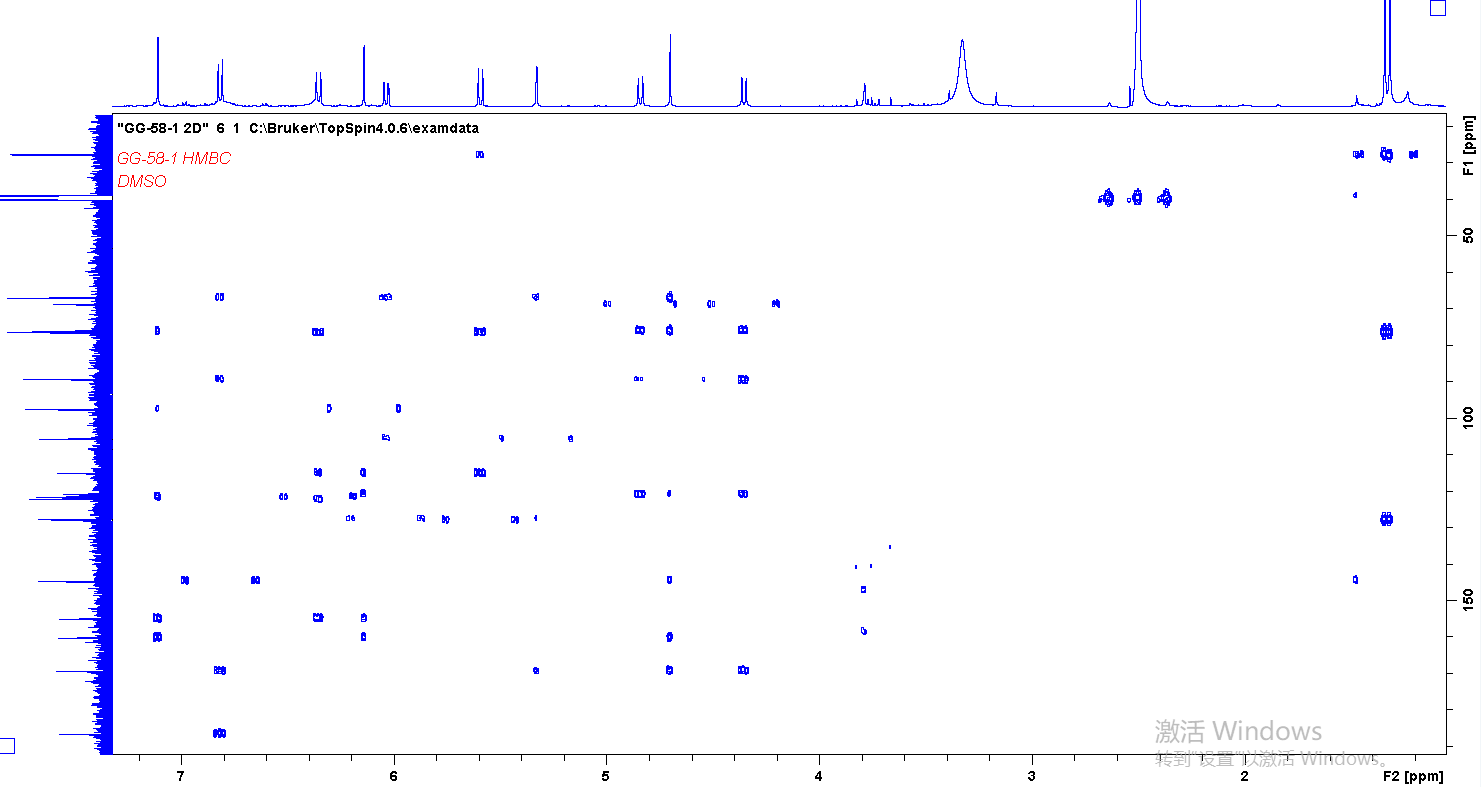


Figure S13. HMBC spectrum of compound **7** in DMSO-*d*6


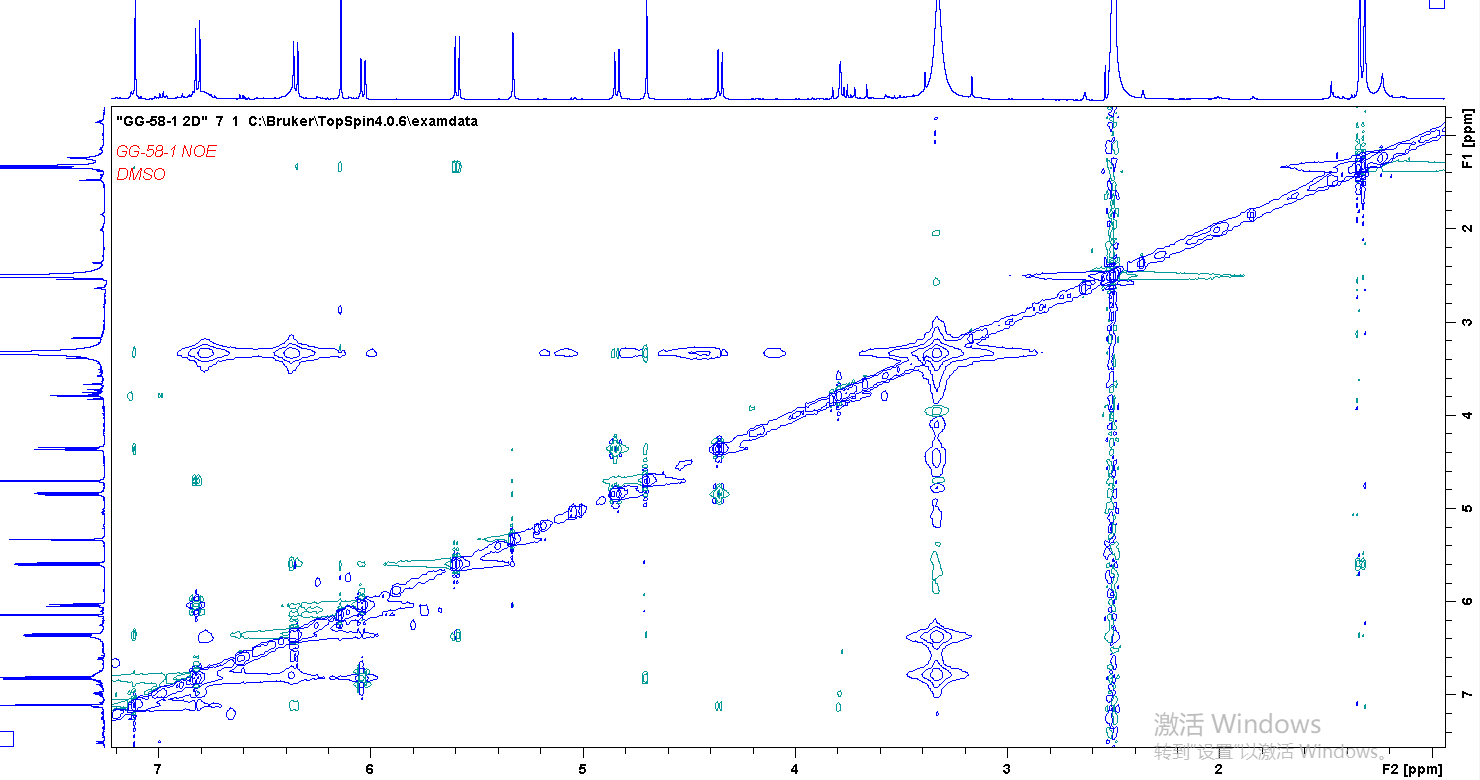


Figure S14. NOESY spectrum of compound **7** in DMSO-*d*6


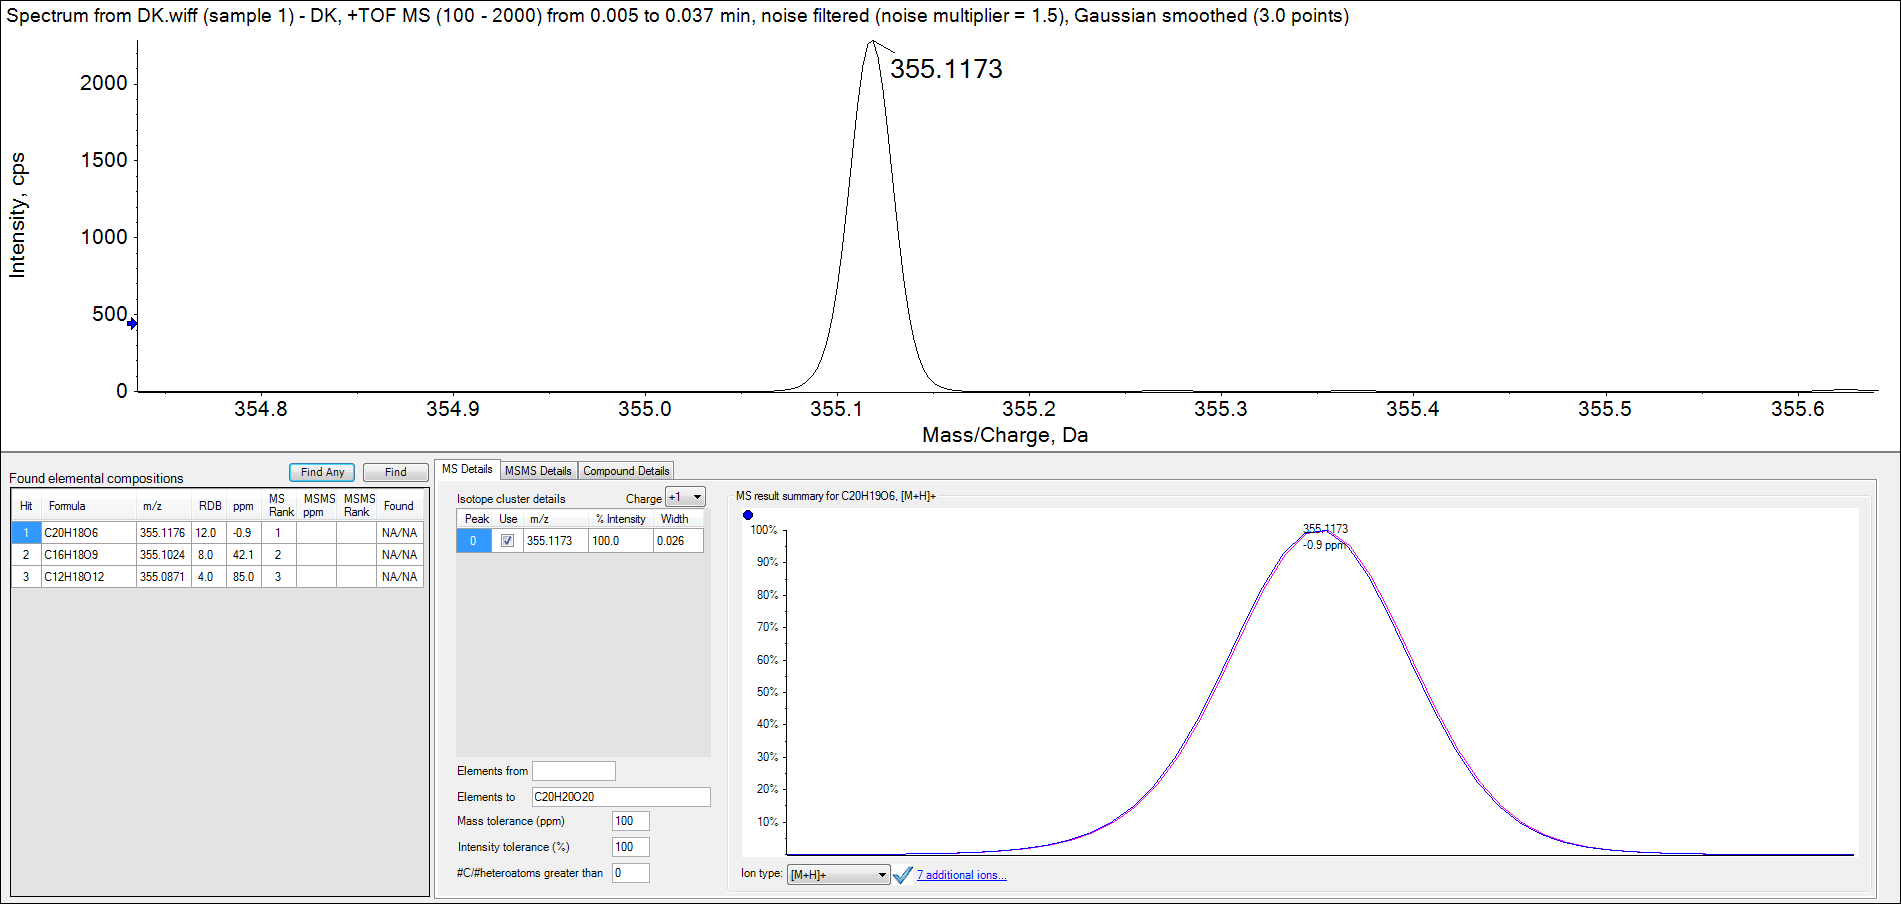


Figure S15. HRESIMS of compound **7**





Figure S16. Calculated ECD spectra of 6a*S*,11a*R*,11b*R*-**7** and 6a*R*,11a*S*,11b*S*-**7**





Figure S17. Calculated ECD spectra of 6a*R*,11a*S*,11b*R*-**7** and 6a*S*,11a*R*,11b*S*-**7**





Figure S18. Calculated ECD spectra of 6a*R*,11a*S*,11b*R*-**7** and 6a*R*,11a*R*,11b*S*-**7**
